# Supplementary material
Source: MDPI journal article supplement (https://www.mdpi.com/2071-1050/2/8/2686)
Supplement: s1 [file s1]

Article

# Using Scenario Visioning and Participatory System Dynamics Modeling to Investigate the Future: Lessons from Minnesota 2050

Laura K. Schmitt Olabisi <sup>1,\*</sup>, Anne R. Kapuscinski <sup>2</sup>, Kris A. Johnson <sup>3</sup>, Peter B. Reich <sup>4</sup>, Brian Stenquist <sup>5</sup> and Kathryn J. Draeger <sup>6</sup>

<sup>1</sup> Department of Community, Agriculture, Recreation, and Resource Studies, Michigan State University, 151 Natural Resources Building, East Lansing, MI 48824, USA

<sup>2</sup> Environmental Studies Program, Dartmouth College, 6182 Steele Hall, Hanover, NH 03755, USA; E-Mail: anne.r.kapuscinski@dartmouth.edu

<sup>3</sup> Institute on the Environment, University of Minnesota, 325 VoTech Building, 1954 Buford Avenue, St. Paul, MN 55108, USA; E-Mail: krisj@umn.edu

<sup>4</sup> Department of Forest Resources, University of Minnesota, 115 Green Hall, 1530 Cleveland Avenue N, St. Paul, MN 55108, USA; E-Mail: preich@umn.edu

<sup>5</sup> Meeting Challenges, 1022 West Country Road D, St. Paul, MN 55126, USA; E-Mail: meetingchallenges@prodigy.net

<sup>6</sup> University of Minnesota Regional Sustainable Development Partnerships, 411 Borlaug Hall, 1991 Upper Buford Circle, St. Paul, MN 55108, USA; E-Mail: Draeg001@umn.edu

\* Author to whom correspondence should be addressed; E-Mail: schmi420@msu.edu; Tel.: +1-517-432-4128; Fax: +1-517-353-8994.

*Received: 10 July 2010; in revised form: 17 August 2010 / Accepted: 18 August 2010 /*

*Published: 24 August 2010*

---

## Appendix A. Baseline Model Parameters

The variables and conversion factors in the table below provided the baseline average for model parameterization. These factors were altered if explicitly or implicitly called for in the scenario. For example, if a scenario described the population in Minnesota 2050 as either ‘high’ or ‘low’, the model would be run with a population size increased above or decreased below this baseline, respectively.

### Appendix A. Baseline Model Parameters.

| Variable/Factor                                     | Value                                                                      |             | Data Source                                                        |
|-----------------------------------------------------|----------------------------------------------------------------------------|-------------|--------------------------------------------------------------------|
| Population in Minnesota                             | 5,205,291                                                                  |             | Minnesota State Demographic Center                                 |
| Average water consumption per person                | 69.3 gallons/person/day                                                    |             | American Water Works Association                                   |
| Industrial water use                                | 161 billion gallons                                                        |             | Minnesota Department of Natural Resources water records database   |
| Average statewide precipitation                     | 28.4 inches                                                                |             | Minnesota Climatology Working Group                                |
| Average statewide precipitation during drought year | 10 inches                                                                  |             | Minnesota Climatology Working Group                                |
| Electricity demand per person                       | 12.7 mwh/person                                                            |             | Minnesota Pollution Control Agency                                 |
| Vehicle miles driven/person/year                    | 10,415                                                                     |             | Minnesota Pollution Control Agency                                 |
| Passenger vehicle fleet fuel efficiency             | 20 miles/gallon                                                            |             | Minnesota Pollution Control Agency                                 |
| Truck miles driven/year (diesel)                    | 3.22 billion                                                               |             | Minnesota Pollution Control Agency                                 |
| Truck fleet fuel efficiency (diesel)                | 5.68 miles/gallon                                                          |             | Minnesota Pollution Control Agency                                 |
| Urban land area/person                              | 0.74 acres                                                                 |             | University of Minnesota Remote Sensing and Geospatial Analysis Lab |
| Home heating demand/person/year                     | 54.8 mmbtu                                                                 |             | Minnesota Pollution Control Agency                                 |
| Heating fuels/acre (wood)                           | 186.43 mmbtu                                                               |             | USDA Forest Service Forest Inventory & Analysis                    |
| Calories/person/day                                 | 2,800 Kcal                                                                 |             | Estimate, based on UN nutritional requirements                     |
| Food calories/acre                                  | 1.4 million                                                                |             | Estimate, based on informal discussion with MN farmers             |
| Irrigation intensity/food acre                      | 0.6 acre/ft                                                                |             | 2003 Minnesota Agricultural Census                                 |
| Amt. food acres irrigated                           | Range: 2.5%–10% ag. area                                                   |             | 2003 Minnesota Agricultural Census                                 |
| Transportation fuel mix                             | Gasoline: 314 mil. gals<br>Ethanol: 2.3 mil. gals<br>Diesel: 9.8 mil. gals |             | Minnesota Pollution Control Agency                                 |
| Electricity fuel mix (mmbtu)                        | Coal                                                                       | 362,191,270 | Minnesota Pollution Control Agency                                 |
|                                                     | Oil                                                                        | 2,313,063   |                                                                    |
|                                                     | Gas                                                                        | 30,202,841  |                                                                    |
|                                                     | Nuclear                                                                    | 133,974,411 |                                                                    |
|                                                     | Hydro                                                                      | 2,927,726   |                                                                    |
|                                                     | Wind                                                                       | 15,380,460  |                                                                    |
|                                                     | Wood                                                                       | 6,092,460   |                                                                    |
| Home heating fuel mix (mmbtu)                       | Coal                                                                       | 1,122,899   | Minnesota Pollution Control Agency                                 |
|                                                     | Natural Gas                                                                | 226,502,969 |                                                                    |
|                                                     | Wood                                                                       | 14,617,957  |                                                                    |
|                                                     | Diesel                                                                     | 20,748,301  |                                                                    |
|                                                     | LPG                                                                        | 22,194,359  |                                                                    |
| Mmbtu/mwh conversion, coal                          | 0.0917                                                                     |             | Minnesota Pollution Control Agency                                 |
| Mmbtu/mwh conversion, nuclear                       | 0.0938                                                                     |             | Minnesota Pollution Control Agency                                 |

### Appendix A. *Cont.*

| Variable/Factor                                                            | Value                         | Data Source                                                                                                                                                            |
|----------------------------------------------------------------------------|-------------------------------|------------------------------------------------------------------------------------------------------------------------------------------------------------------------|
| Mmbtu/mwh conversion, oil                                                  | 0.0410                        | Minnesota Pollution Control Agency                                                                                                                                     |
| Mmbtu/mwh conversion, gas                                                  | 0.0703                        | Minnesota Pollution Control Agency                                                                                                                                     |
| Mmbtu/mwh conversion, hydropower                                           | 0.2725                        | Minnesota Pollution Control Agency                                                                                                                                     |
| Mmbtu/mwh conversion, wind                                                 | 0.1172                        | Minnesota Pollution Control Agency                                                                                                                                     |
| Mmbtu/mwh conversion, wood                                                 | 0.0234                        | Minnesota Pollution Control Agency                                                                                                                                     |
| Acres/mwh, wind electricity                                                | 0.000043                      | National Renewable Energy Laboratory                                                                                                                                   |
| Acres/mwh, wood electricity                                                | 0.008814                      | Mann, M.K. and P.L. Spath. 1997. <i>Life Cycle Assessment of a Biomass Gasification Combined-Cycle Power Station</i> . Colorado: National Renewable Energy Laboratory. |
| Gallons water/mwh, coal electricity                                        | 210                           | U.S. Department of Energy. 2006. <i>Energy Demands on Water Resources: Report to Congress on the Interdependency of Energy and Water</i> . Washington: USDOE           |
| Gallons water/mwh, nuclear electricity                                     | 590                           | <i>Ibid.</i>                                                                                                                                                           |
| Gallons water/mwh, oil electricity                                         | 430                           | <i>Ibid.</i>                                                                                                                                                           |
| Gallons water/mwh, gas electricity                                         | 290                           | <i>Ibid.</i>                                                                                                                                                           |
| Gallons water/mwh, hydroelectricity                                        | 4,500                         | <i>Ibid.</i>                                                                                                                                                           |
| Gallons water/mwh, wind electricity                                        | 1                             | <i>Ibid.</i>                                                                                                                                                           |
| Gallons water/mwh, wood electricity                                        | 330                           | <i>Ibid.</i>                                                                                                                                                           |
| Mmbtu/gallon gasoline                                                      | 0.124                         | U.S. Department of Energy                                                                                                                                              |
| Mmbtu/gallon ethanol                                                       | 0.075                         | Oak Ridge National Laboratory                                                                                                                                          |
| Mmbtu/gallon diesel                                                        | 0.139                         | U.S. Department of Energy                                                                                                                                              |
| Mmbtu/gallon biodiesel                                                     | 0.130 (100% vegetable diesel) | North Dakota State University                                                                                                                                          |
| Acres/gallon corn ethanol                                                  | 0.0017                        | Minnesota Department of Agriculture                                                                                                                                    |
| Acres/gallon prairie grass ethanol                                         | 0.0111                        | Tilman, D., Hill, J., and C. Lehman. 2006. Carbon-Negative Biofuels from Low-Input High-Diversity Grassland Biomass. <i>Science</i> 314: 1598-1600.                    |
| Acres/gallon poplar ethanol                                                | 0.0631                        | Production specifications of Range Fuels (funded by DOE): <a href="http://www.rangefuels.com">www.rangefuels.com</a>                                                   |
| Acres/gallon soy biodiesel                                                 | 0.01522                       | Estimated from Minnesota Department of Agriculture                                                                                                                     |
| Water consumption per gallon gasoline refining (taking place in Minnesota) | 1.0 gallon                    | U.S. Department of Energy. 2006. <i>Energy Demands on Water Resources: Report to Congress on the Interdependency of Energy and Water</i> . Washington: USDOE           |

### Appendix A. Cont.

| Variable/Factor                                                          | Value       | Data Source                                                                                                                                                  |
|--------------------------------------------------------------------------|-------------|--------------------------------------------------------------------------------------------------------------------------------------------------------------|
| Water consumption per gallon ethanol processing (including irrigation)   | 19 gallons  | Minnesota Department of Agriculture                                                                                                                          |
| Water consumption per gallon biodiesel processing (including irrigation) | 21 gallons  | Minnesota Department of Agriculture; 2003 Minnesota Agricultural Census                                                                                      |
| Water consumption per gallon diesel processing                           | 1 gallon    | U.S. Department of Energy. 2006. <i>Energy Demands on Water Resources: Report to Congress on the Interdependency of Energy and Water</i> . Washington: USDOE |
| Job creation/gallon ethanol prod.                                        | 0.000020642 | Minnesota Department of Agriculture                                                                                                                          |

### Appendix B. Scenario Parameters

Modeled parameters for each scenario that are different from the baseline parameters above are listed in the tables below. Note that these values are assumed for the year 2050.

#### Appendix B. Scenario Parameters.

| Variable/Factor                         | Value                                                                        |               | Data Source/Scenario Logic                                                                                                |
|-----------------------------------------|------------------------------------------------------------------------------|---------------|---------------------------------------------------------------------------------------------------------------------------|
| Regional Self-Reliance                  |                                                                              |               |                                                                                                                           |
| Population in Minnesota                 | 6,786,000                                                                    |               | Population somewhat larger than current                                                                                   |
| Average water consumption per person    | 45.2 gallons                                                                 |               | Water conservation in effect                                                                                              |
| Industrial water use                    | 92.52 billion gallons                                                        |               | Industrial activity reduced compared with present                                                                         |
| Electricity demand/person               | 10.7 mwh/person                                                              |               | Reduced to approx. 1990 MN levels                                                                                         |
| Vehicle miles/person/year               | 8273                                                                         |               | Reduced to approx. 1990 MN levels                                                                                         |
| Passenger vehicle fleet fuel efficiency | 22.7 miles/gallon                                                            |               | Fleet efficiency increased, but not by much—given no way to replace old cars                                              |
| Truck miles driven/year (diesel)        | 0                                                                            |               | Long distance trucking is no longer operating. However, some biodiesel is still used on-farm (approx. 75 million gallons) |
| Food calories/acre                      | 817,600–1.4 million                                                          |               | Possibly more land-intensive farming methods (e.g., grass fed beef)                                                       |
| Transportation fuel mix                 | Ethanol: 4.3 billion gallons<br>(92% from prairie grass; 8% from wood waste) |               | Fleet dependent on locally produced fuels; maximum wood from waste estimated using Minnesota BIOPET project numbers       |
| Electricity fuel mix (mmbtu)            | Coal                                                                         | 0             | Dependence on local fuels                                                                                                 |
|                                         | Oil                                                                          | 0             |                                                                                                                           |
|                                         | Gas                                                                          | 0             |                                                                                                                           |
|                                         | Nuclear                                                                      | 0             |                                                                                                                           |
|                                         | Hydro                                                                        | 2,927,726     |                                                                                                                           |
|                                         | Wind                                                                         | 248,858,600   |                                                                                                                           |
|                                         | Wood                                                                         | 1,676,868,060 |                                                                                                                           |

### Appendix B. Cont.

| Variable/Factor                                | Value                                                                                                                 |               | Data Source/Scenario Logic                                                                                                  |
|------------------------------------------------|-----------------------------------------------------------------------------------------------------------------------|---------------|-----------------------------------------------------------------------------------------------------------------------------|
| Regional Self-Reliance                         |                                                                                                                       |               |                                                                                                                             |
| Home heating fuel mix (mmbtu)                  | Coal                                                                                                                  | 0             | Dependence on local fuels                                                                                                   |
|                                                | Natural Gas                                                                                                           | 0             |                                                                                                                             |
|                                                | Wood                                                                                                                  | 1,208,053,186 |                                                                                                                             |
|                                                | Diesel                                                                                                                | 0             |                                                                                                                             |
|                                                | LPG                                                                                                                   | 0             |                                                                                                                             |
| Corporate Industrialism                        |                                                                                                                       |               |                                                                                                                             |
| Population in Minnesota                        | 6,786,000                                                                                                             |               | Population somewhat larger than current                                                                                     |
| Average water consumption per person           | 69.3 gallons/person/day for wealthy people (5% of population);<br>45.2 gallons/person/day for other 95% of population |               | Divergence in living standards between wealthy, poor                                                                        |
| Industrial water use                           | 330.68 billion gallons                                                                                                |               | Industrial sector has expanded                                                                                              |
| Electricity demand/person                      | 23.7 mwh/person for wealthy people (5% of population);<br>5.4 mwh/person for other 95% of population                  |               | Divergence in living standards between wealthy, poor                                                                        |
| Vehicle miles/person/year                      | 14,286 for wealthy people (5% of population);<br>5,757 for other 95% of population                                    |               | Divergence in living standards between wealthy, poor                                                                        |
| Passenger vehicle fleet fuel efficiency        | Wealthy drive 35-mpg cars;<br>poor rely on motor bikes (50 mpg) and buses (7 mpg)                                     |               | Transportation mode similar to e.g., modern China                                                                           |
| Bus and truck miles driven/year (diesel)       | 17.9 billion (bus);<br>5.4 billion (truck)                                                                            |               | Buses being used for passenger transportation; trucks used for increased industrial transport                               |
| Home heating demand/person/year                | 54.8 mmbtu for wealthiest 5%;<br>26.17 mmbtu for bottom 95%                                                           |               | Divergence in living standards between wealthy, poor                                                                        |
| Calories/person/day                            | 3,500 Kcal for top 5%;<br>2,200 Kcal for bottom 95%                                                                   |               | Divergence in living standards between wealthy, poor                                                                        |
| Food calories/acre                             | 1.08 million for top 5%;<br>1.6 million for bottom 95%                                                                |               | Wealthy eat more land-intensive diet (e.g., meat)                                                                           |
| Transportation fuel mix (gallons)              | Gasoline                                                                                                              | 393,235,758   | 20% ethanol mixing in motor fuels;<br>20% biodiesel mixing                                                                  |
|                                                | Diesel                                                                                                                | 847,850,691   |                                                                                                                             |
|                                                | Biodiesel                                                                                                             | 464,682,064   |                                                                                                                             |
|                                                | Ethanol                                                                                                               | 135,537,881   |                                                                                                                             |
| Electricity fuel mix (mwh filled by each fuel) | Coal                                                                                                                  | 27,209,449    | Electricity mix approximately the same as at present, but renewable fuels have been eliminated (coal substitutes for these) |
|                                                | Oil                                                                                                                   | 66,567        |                                                                                                                             |
|                                                | Gas                                                                                                                   | 1,339,670     |                                                                                                                             |
|                                                | Nuclear                                                                                                               | 12,190,166    |                                                                                                                             |
|                                                | Hydro                                                                                                                 | 797,776       |                                                                                                                             |
|                                                | Wind                                                                                                                  | 0             |                                                                                                                             |
|                                                | Wood                                                                                                                  | 0             |                                                                                                                             |

## Appendix B. *Cont.*

| Variable/Factor                                   | Value                                                                                                                                                                                            |             | Data Source/Scenario Logic                                                                                                                                                                                                                                                                              |
|---------------------------------------------------|--------------------------------------------------------------------------------------------------------------------------------------------------------------------------------------------------|-------------|---------------------------------------------------------------------------------------------------------------------------------------------------------------------------------------------------------------------------------------------------------------------------------------------------------|
| Corporate Industrialism                           |                                                                                                                                                                                                  |             |                                                                                                                                                                                                                                                                                                         |
| Home heating fuel mix (mmbtu)                     | Coal                                                                                                                                                                                             | 0           | Assumed in scenario                                                                                                                                                                                                                                                                                     |
|                                                   | Natural Gas                                                                                                                                                                                      | 169,874,039 |                                                                                                                                                                                                                                                                                                         |
|                                                   | Wood                                                                                                                                                                                             | 0           |                                                                                                                                                                                                                                                                                                         |
|                                                   | Diesel                                                                                                                                                                                           | 0           |                                                                                                                                                                                                                                                                                                         |
|                                                   | LPG                                                                                                                                                                                              | 0           |                                                                                                                                                                                                                                                                                                         |
| Green Industrial Minnesota                        |                                                                                                                                                                                                  |             |                                                                                                                                                                                                                                                                                                         |
| Population in Minnesota                           | 8,212,229                                                                                                                                                                                        |             | High population growth due to green energy industry                                                                                                                                                                                                                                                     |
| Average water consumption per person              | 45.2 gallons                                                                                                                                                                                     |             | Water use in households is more efficient                                                                                                                                                                                                                                                               |
| Industrial water use                              | 88.9 billion gallons                                                                                                                                                                             |             | Industrial output has increased, but water use is more efficient                                                                                                                                                                                                                                        |
| Electricity demand/person                         | 26.2 mwh/person (in-state; electricity is also produced for export)                                                                                                                              |             | Some personal transportation is electric (see details below)                                                                                                                                                                                                                                            |
| Vehicle miles/person/year                         | 10,459                                                                                                                                                                                           |             | Increased personal travel compared with present                                                                                                                                                                                                                                                         |
| Urban land area/person                            | 1.25 acres                                                                                                                                                                                       |             | Increased urban growth into rural areas of state                                                                                                                                                                                                                                                        |
| Passenger vehicle fleet fuel efficiency           | Bullet train (electric):<br>0.03 kwh/person-km<br>Personal Rapid Transit:<br>0.00013 mwh/person-mile<br>Hydrogen fuel-cell vehicle:<br>0.000538124 mwh/person-mile to produce, compress hydrogen |             | Takagi, Japanese Railway & Transport Review 40, March 2005;<br>Dunning (ed.) 2003: Personal Automated Transportation (Advanced Transit Association);<br>Qadrdan, M. & Shayegan, J. 2008. Economic assessment of hydrogen fueling station, a case study for Iran. <i>Renewable Energy</i> 33: 2525-2531. |
| Truck miles driven/year (diesel)                  | 5.4 billion                                                                                                                                                                                      |             | Increased transportation needs due to industrial growth                                                                                                                                                                                                                                                 |
| Truck fuel mix                                    | Algal biodiesel: 1.6 billion gallons                                                                                                                                                             |             | Parameters of scenario                                                                                                                                                                                                                                                                                  |
| Gallons biodiesel produced (including for export) | 63 billion                                                                                                                                                                                       |             | Assuming all potential land is in biodiesel production (minus land required for electricity production)                                                                                                                                                                                                 |
| Gallons water/gallon algal biodiesel              | 2.14 (assuming 90% water recycling)                                                                                                                                                              |             | Roger Ruan lab, University of Minnesota                                                                                                                                                                                                                                                                 |
| Gallons algal biodiesel production/acre           | 5,000 (annually)                                                                                                                                                                                 |             | Roger Ruan lab, University of Minnesota                                                                                                                                                                                                                                                                 |
| Home heating demand/person/year                   | Home heating is assumed to be entirely from geothermal sources and heat waste from industrial processes.                                                                                         |             |                                                                                                                                                                                                                                                                                                         |
| Food calories/acre                                | No food is produced in Minnesota.                                                                                                                                                                |             |                                                                                                                                                                                                                                                                                                         |

## Appendix B. Cont.

| Variable/Factor                                   | Value                                                                                                                                 |                | Data Source/Scenario Logic                                                                                                                                                                                                                                                                                                                                                                                                                                                                                                                                                      |
|---------------------------------------------------|---------------------------------------------------------------------------------------------------------------------------------------|----------------|---------------------------------------------------------------------------------------------------------------------------------------------------------------------------------------------------------------------------------------------------------------------------------------------------------------------------------------------------------------------------------------------------------------------------------------------------------------------------------------------------------------------------------------------------------------------------------|
| Green Industrial Minnesota                        |                                                                                                                                       |                |                                                                                                                                                                                                                                                                                                                                                                                                                                                                                                                                                                                 |
| Transportation fuel mix                           | 50% of personal transportation takes place on electric trains; 25% on hydrogen fuel cell vehicles, and 25% on personal rapid transit. |                | Parameters described in scenario                                                                                                                                                                                                                                                                                                                                                                                                                                                                                                                                                |
| Electricity fuel mix<br>(mwh filled by each fuel) | Note: this scenario assumes Minnesota produces the maximum possible electrical output with this fuel mix, for in-state use and export |                | Maximum wind capacity calculated from National Wind. Solar roof potential for state calculated from Roofray: 11.4 watts/square foot average. 1/3 of urban land area in state assumed to produce solar roof electricity. Wave generation in Lake Superior calculated as: power in watt/meter = (water density (kg/m <sup>3</sup> ) × (acceleration due to gravity 9.8 m/s <sup>2</sup> ) <sup>2</sup> × period of wave (s) × wave height (m))/32 × pi [equation from U.S. Department of the Interior]. Data for calculations taken from NOAA buoy measurements in Lake Superior. |
|                                                   | Coal                                                                                                                                  | 0              |                                                                                                                                                                                                                                                                                                                                                                                                                                                                                                                                                                                 |
|                                                   | Oil                                                                                                                                   | 0              |                                                                                                                                                                                                                                                                                                                                                                                                                                                                                                                                                                                 |
|                                                   | Gas                                                                                                                                   | 0              |                                                                                                                                                                                                                                                                                                                                                                                                                                                                                                                                                                                 |
|                                                   | Nuclear                                                                                                                               | 0              |                                                                                                                                                                                                                                                                                                                                                                                                                                                                                                                                                                                 |
|                                                   | Hydro                                                                                                                                 | 797,776        |                                                                                                                                                                                                                                                                                                                                                                                                                                                                                                                                                                                 |
|                                                   | Wind                                                                                                                                  | 657,000,000    |                                                                                                                                                                                                                                                                                                                                                                                                                                                                                                                                                                                 |
|                                                   | Wave Generation                                                                                                                       | 2044           |                                                                                                                                                                                                                                                                                                                                                                                                                                                                                                                                                                                 |
|                                                   | Solar Roofs                                                                                                                           | 11,166,838,602 |                                                                                                                                                                                                                                                                                                                                                                                                                                                                                                                                                                                 |
| Wood                                              | 114,962,413                                                                                                                           |                |                                                                                                                                                                                                                                                                                                                                                                                                                                                                                                                                                                                 |
| Gallons water/mwh solar electricity               | 0                                                                                                                                     |                | [assumed; no data available]                                                                                                                                                                                                                                                                                                                                                                                                                                                                                                                                                    |
| Gallons water/mwh wave generated electricity      | 0                                                                                                                                     |                | [assumed; no data available]                                                                                                                                                                                                                                                                                                                                                                                                                                                                                                                                                    |
| Urbanized BioTechia                               |                                                                                                                                       |                |                                                                                                                                                                                                                                                                                                                                                                                                                                                                                                                                                                                 |
| Population in Minnesota                           | 6,545,000                                                                                                                             |                | Population somewhat larger than current                                                                                                                                                                                                                                                                                                                                                                                                                                                                                                                                         |
| Average water consumption per person              | 69.3 gallons/person/day for wealthy people (5% of population); 45.2 gallons/person/day for other 95% of population                    |                | Divergence in living standards between wealthy, poor                                                                                                                                                                                                                                                                                                                                                                                                                                                                                                                            |
| Industrial water use                              | 330.7 billion gallons                                                                                                                 |                | Industrial sector has expanded                                                                                                                                                                                                                                                                                                                                                                                                                                                                                                                                                  |
| Electricity demand/person                         | 23.7 mwh/person for wealthy people (5% of population); 5.4 mwh/person for other 95% of population                                     |                | Divergence in living standards between wealthy, poor                                                                                                                                                                                                                                                                                                                                                                                                                                                                                                                            |
| Vehicle miles/person/year                         | 14,286 for wealthy people (5% of population); 5,790 for other 95% of population                                                       |                | Divergence in living standards between wealthy, poor                                                                                                                                                                                                                                                                                                                                                                                                                                                                                                                            |
| Passenger vehicle fleet fuel efficiency           | 35 mpg for wealthy people (5% of population); 20 mpg for other 95% of population                                                      |                | The poor have older, less efficient cars than the wealthy                                                                                                                                                                                                                                                                                                                                                                                                                                                                                                                       |
| Bus and truck miles driven/year (diesel)          | 0                                                                                                                                     |                | Long-haul trucking is non-existent; goods are consumed only within Midwest                                                                                                                                                                                                                                                                                                                                                                                                                                                                                                      |
| Home heating demand/person/year                   | 21.8 mmbtu for wealthiest 5%; 26.17 mmbtu for bottom 95%                                                                              |                | The wealthy are using natural gas for home heating, which delivers more heat per energy unit than wood used by the bottom 95%.                                                                                                                                                                                                                                                                                                                                                                                                                                                  |

### Appendix B. Cont.

| Variable/Factor                                | Value                                                                          |             | Data Source/Scenario Logic                                                                                                                                                                         |
|------------------------------------------------|--------------------------------------------------------------------------------|-------------|----------------------------------------------------------------------------------------------------------------------------------------------------------------------------------------------------|
| Urbanized BioTechia                            |                                                                                |             |                                                                                                                                                                                                    |
| Calories/person/day                            | 3,500 Kcal for top 5%;<br>2,200 Kcal for bottom 95%                            |             | Divergence in living standards between wealthy, poor                                                                                                                                               |
| Food calories/acre                             | 1.08 million for top 5%;<br>1.6 million for bottom 95%                         |             | Wealthy eat more land-intensive diet (e.g., meat)                                                                                                                                                  |
| Transportation fuel mix (gallons)              | Corn-based ethanol: 4,110,988,601<br>Coal-based synfuels: 133,574,100          |             | 2.6 million barrels fuel per day could be made with 475 million tons of coal per year (National Coal Council)                                                                                      |
| Electricity fuel mix (mwh filled by each fuel) | Coal                                                                           | 18,440,909  | According to the scenario logic, only resources from the Midwest can be used, so no nuclear or oil fuels are available. Most electricity for the bottom 95% of the populace is from wind and wood. |
|                                                | Oil                                                                            | 0           |                                                                                                                                                                                                    |
|                                                | Gas                                                                            | 69,019      |                                                                                                                                                                                                    |
|                                                | Nuclear                                                                        | 0           |                                                                                                                                                                                                    |
|                                                | Hydro                                                                          | 470,189     |                                                                                                                                                                                                    |
|                                                | Wind                                                                           | 17,254,652  |                                                                                                                                                                                                    |
|                                                | Wood                                                                           | 4,313,663   |                                                                                                                                                                                                    |
| Home heating fuel mix (mmbtu)                  | Coal                                                                           | 0           | Wealthy 5% heat their homes with natural gas; 95% heat their homes with wood.                                                                                                                      |
|                                                | Natural Gas                                                                    | 28,506,903  |                                                                                                                                                                                                    |
|                                                | Wood                                                                           | 168,724,751 |                                                                                                                                                                                                    |
|                                                | Diesel                                                                         | 0           |                                                                                                                                                                                                    |
|                                                | LPG                                                                            | 0           |                                                                                                                                                                                                    |
| Pandemic Collapse                              |                                                                                |             |                                                                                                                                                                                                    |
| Population in Minnesota                        | 3,695,081                                                                      |             | Approximately 30% of population lost to pandemic (roughly equivalent to medieval Black Plague)                                                                                                     |
| Average water consumption per person           | Water use is severely limited; confined to surface water and rural wells.      |             |                                                                                                                                                                                                    |
| Industrial water use                           | 0                                                                              |             | Collapse of industry                                                                                                                                                                               |
| Electricity demand/person                      | 0                                                                              |             | Population flee their homes; electricity use negligible                                                                                                                                            |
| Vehicle miles/person/year                      | 0                                                                              |             | See above                                                                                                                                                                                          |
| Home heating demand/person/year                | Nepal’s level of wood fuel consumption assumed at 14.11 GJ/person/year in 2003 |             | World Bank                                                                                                                                                                                         |
| Calories/person/day                            | 2,000                                                                          |             | Subsistence diet                                                                                                                                                                                   |
| Food calories/acre                             | 663,636                                                                        |             | Estimated based on vegetarian subsistence diet                                                                                                                                                     |
| Home heating fuel mix (mmbtu)                  | 52,137,589                                                                     |             | See above                                                                                                                                                                                          |
| Forest area lost/year                          | 295,063 acres                                                                  |             | See above                                                                                                                                                                                          |

Appendix C. Model Structure.

Land Use

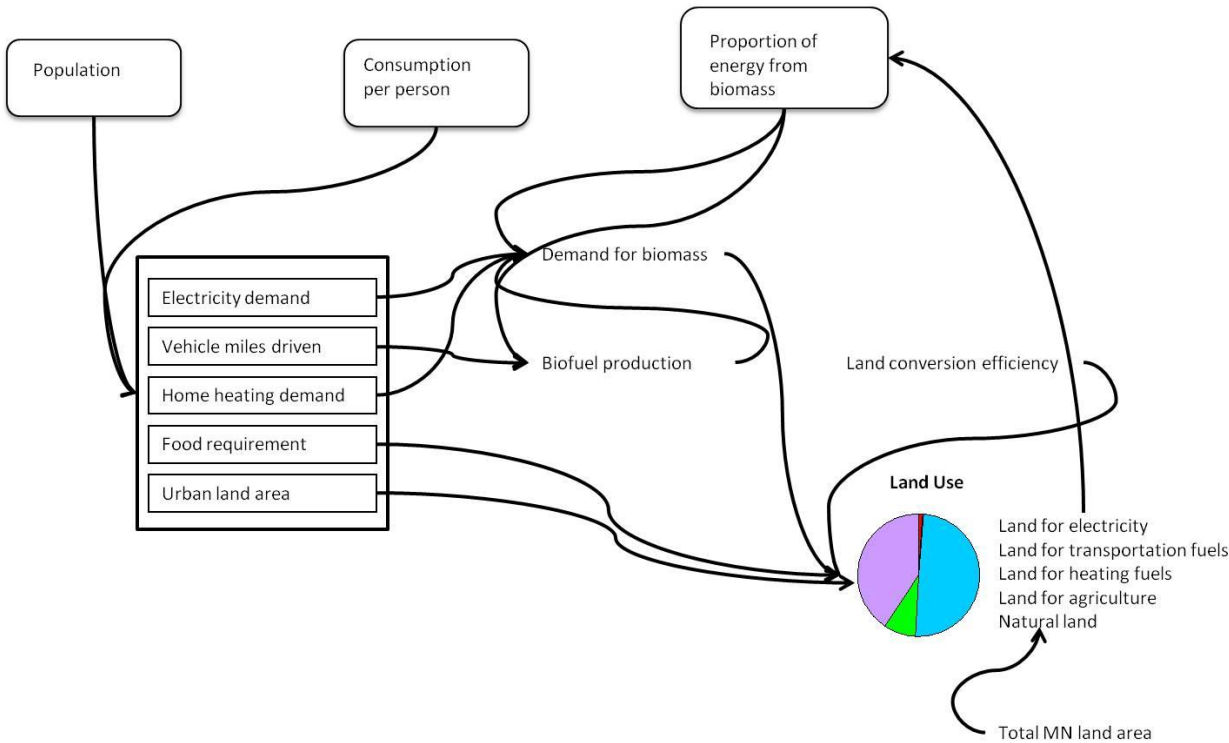

Water Consumption

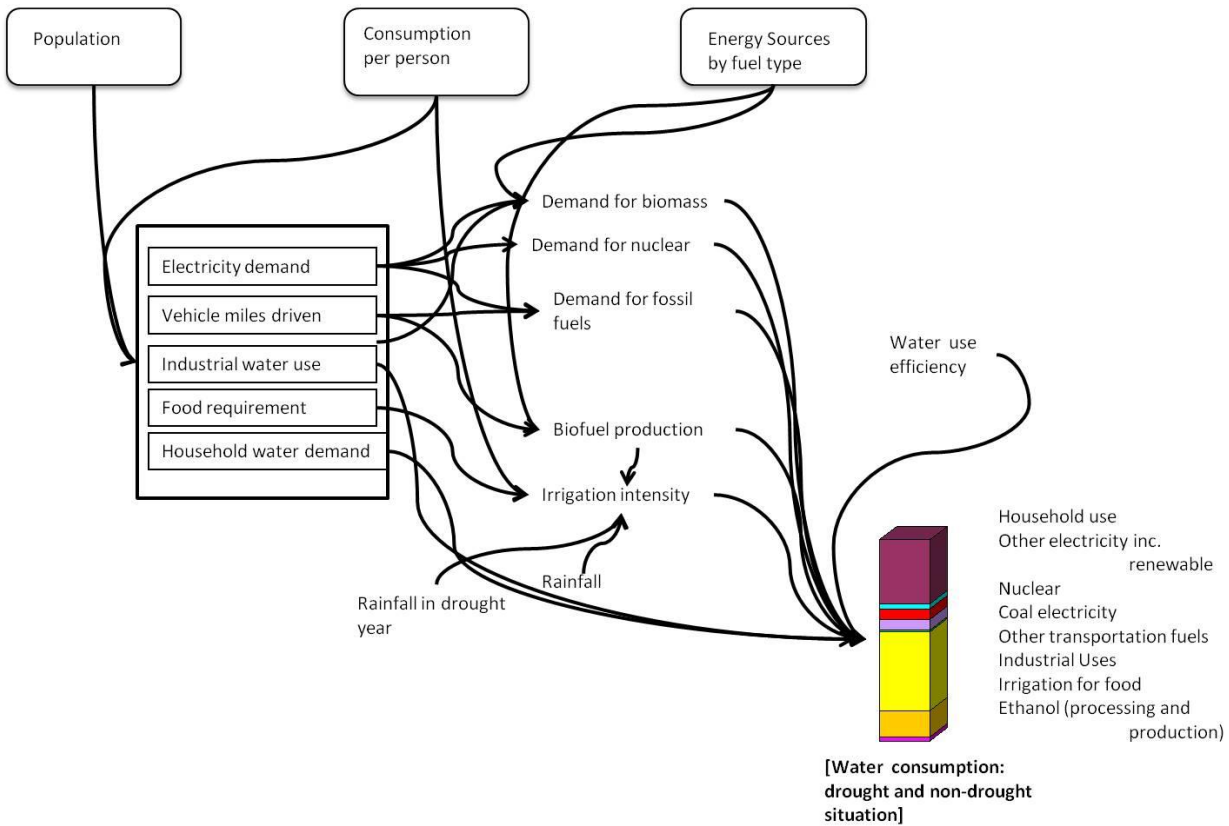

## Appendix C. Cont.

### Energy

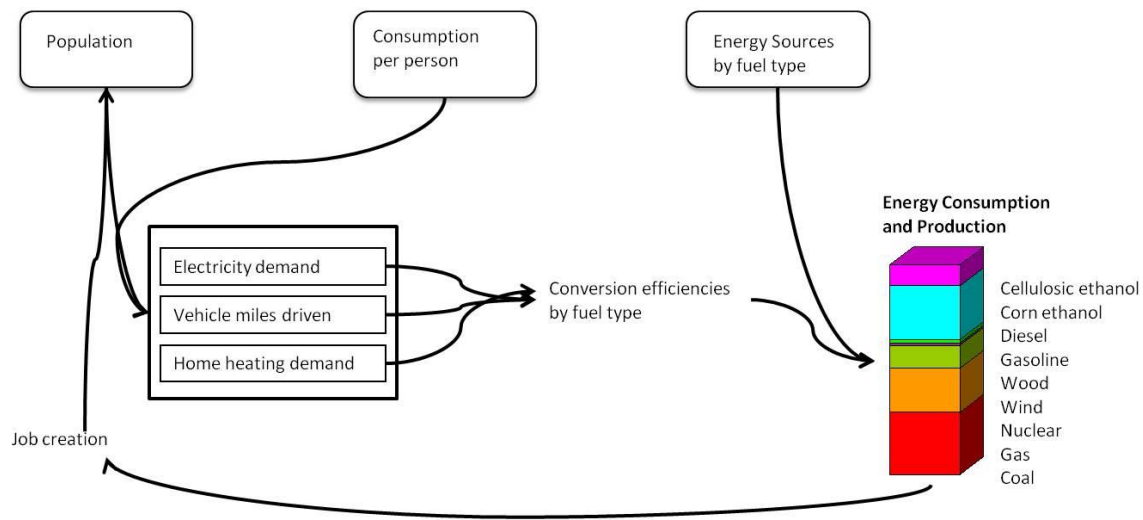

## Appendix D. Input Sheet for Participatory Modeling during Statewide Workshop.

| Population in 2050 |        |
|--------------------|--------|
|                    | people |

| Scenario Name? |
|----------------|
|----------------|

| Electricity Use per Person |                     |
|----------------------------|---------------------|
| 0.00                       | mwh/person annually |

| Electricity Mix        | 2050         | %          |
|------------------------|--------------|------------|
| <i>Coal</i>            |              | 0.00       |
| <i>Gas</i>             |              | 0.00       |
| <i>Nuclear</i>         |              | 0.00       |
| <i>Hydro</i>           |              | 0.00       |
| <i>Wind</i>            |              | 0.00       |
| <i>MSW</i>             |              | 0.00       |
| <i>Wood</i>            |              | 0.00       |
| <i>Wave Generation</i> |              | 0.00       |
| <i>Solar</i>           |              | 0.00       |
|                        | <b>Total</b> | <b>100</b> |

| Vehicle miles traveled per Person |                       |
|-----------------------------------|-----------------------|
| 0                                 | miles/person annually |

| Average Fuel Economy for Cars |                  |
|-------------------------------|------------------|
| 0.00                          | miles per gallon |

| Blending Requirements |                       |
|-----------------------|-----------------------|
| 0                     | % Gasoline is Ethanol |
| 0                     | % Diesel is Biodiesel |

| Heating fuels per capita/year |      |
|-------------------------------|------|
| 30                            | mbtu |

| Heating Fuels Mix  | %            |            |
|--------------------|--------------|------------|
| <i>Wood</i>        |              | 0          |
| <i>Natural Gas</i> |              | 0          |
| <i>Geothermal</i>  |              | 0          |
|                    | <b>Total</b> | <b>100</b> |

Note: greater than 100% means  
MN will produce electricity for export

| Transportation Mix<br>Personal Vehicles | 2050         | % Miles    |
|-----------------------------------------|--------------|------------|
| <i>Car</i>                              |              | 0          |
| <i>Bus</i>                              |              | 0          |
| <i>Motorcycle</i>                       |              | 0          |
| <i>Bullet Train</i>                     |              | 0          |
| <i>Hydrogen Fuel Cell Vehicle</i>       |              | 0          |
| <i>Personal Rapid Transit</i>           |              | 0          |
|                                         | <b>Total</b> | <b>100</b> |

## Appendix D. *Cont.*

| <b>Ethanol Source</b>     |                     | <b>%</b> |
|---------------------------|---------------------|----------|
| <i>Corn</i>               |                     | 0        |
| <i>Cellulosic Wood</i>    |                     | 0        |
| <i>Cellulosic Grasses</i> |                     | 0        |
|                           | <b><i>Total</i></b> | 100      |

*Note: greater than 100% means production for export*

| <b>Biodiesel Source</b> |                     | <b>%</b> |
|-------------------------|---------------------|----------|
| <i>Soy</i>              |                     | 0        |
| <i>Algae</i>            |                     | 0        |
|                         | <b><i>Total</i></b> | 100      |

*Note: greater than 100% means production for export.*

| <b>Agricultural Production: Diet</b> |   |
|--------------------------------------|---|
| Subsistence                          | 0 |
| Or Wealthy                           | 1 |

| <b>% Ag. Produced in State?</b> |  |
|---------------------------------|--|
| 0.00                            |  |

*Note: greater than 100% means agricultural export.*

| <b>Water use per household</b> |                      |
|--------------------------------|----------------------|
| 0                              | <b>gallons daily</b> |

| <b>Industrial Growth Relative to 2005</b> |          |
|-------------------------------------------|----------|
| 0                                         | <b>%</b> |
